# Supplementary material
Source: publisher figshare collection journal article supplement (https://gsapubs.figshare.com/ndownloader/files/30991288)
Supplement: Supplementary file 1 [file 30991288]

## Sheet: sheet1
distance cross slope (m)	Comparison of cross-slope grain distributions at CS1 at T *~ 66400 for different numbers (N) of grains
	N=128	N=210	N=330	N=411	N=503	N=607	N=708	N=765
(-0.375, -0.325)	0.0078125	0.00952381	0.00606061	0.0170316	0.0159046	0.014827	0.0155367	0.0156863
(-0.325, -0.275)	0.015625	0.0238095	0.0272727	0.0218978	0.0218688	0.0263591	0.0240113	0.0222222
(-0.275, -0.225)	0.0234375	0.052381	0.0393939	0.0316302	0.0337972	0.0345964	0.0353107	0.0352941
(-0.225, -0.175)	0.078125	0.0809524	0.0787879	0.0924574	0.0974155	0.0939044	0.0903955	0.0888889
(-0.175, -0.125)	0.078125	0.0857143	0.130303	0.126521	0.135189	0.143328	0.14548	0.141176
(-0.125, -0.075)	0.195312	0.157143	0.148485	0.143552	0.127237	0.136738	0.128531	0.129412
(-0.075, -0.025)	0.195312	0.133333	0.109091	0.109489	0.111332	0.113674	0.111582	0.115033
(-0.025, 0.025)	0.117188	0.0809524	0.109091	0.107056	0.107356	0.0988468	0.107345	0.10719
(0.025, 0.075)	0.0625	0.109524	0.109091	0.104623	0.117296	0.115321	0.121469	0.124183
(0.075, 0.125)	0.078125	0.0904762	0.1	0.104623	0.0934394	0.092257	0.0889831	0.0901961
(0.125, 0.175)	0.078125	0.0857143	0.0606061	0.0583942	0.0596421	0.0593081	0.0649718	0.0627451
(0.175, 0.225)	0.03125	0.0380952	0.0363636	0.0437956	0.0417495	0.0395387	0.0381356	0.0352941
(0.225, 0.275)	0.0234375	0.0333333	0.0272727	0.0218978	0.0218688	0.0181219	0.0155367	0.0196078
(0.275, 0.325)	0.015625	0.0190476	0.0181818	0.0145985	0.0139165	0.0115321	0.0112994	0.0117647
(0.325, 0.375)	0	0	0	0.00243309	0.00198807	0.00164745	0.00141243	0.00130719

## Sheet: G49286
Sun, Z., et al., 2021, Formation of low-gradient bedrock chutes by dry rockfall on planetary surfaces: Geology, https://doi.org/10.1130/G49286.1
